# Supplementary material for: Phytochemical Characterization and Antimicrobial Activity of Several Allium Extracts
Source: MDPI journal article supplement (doi:10.3390/molecules28103980), 2023-05-09
Supplement: s1 [file s1]

## Supplementary material

Title of the manuscript: *Phytochemical Characterization and Antimicrobial Activity of Several Allium Extracts*

Authors: Ioana Andreea Barbu, Alexandra Ciorîță, Rahela Carpa, Augustin Catalin Moț, Anca Butiuc-Keul and Marcel Pârvu

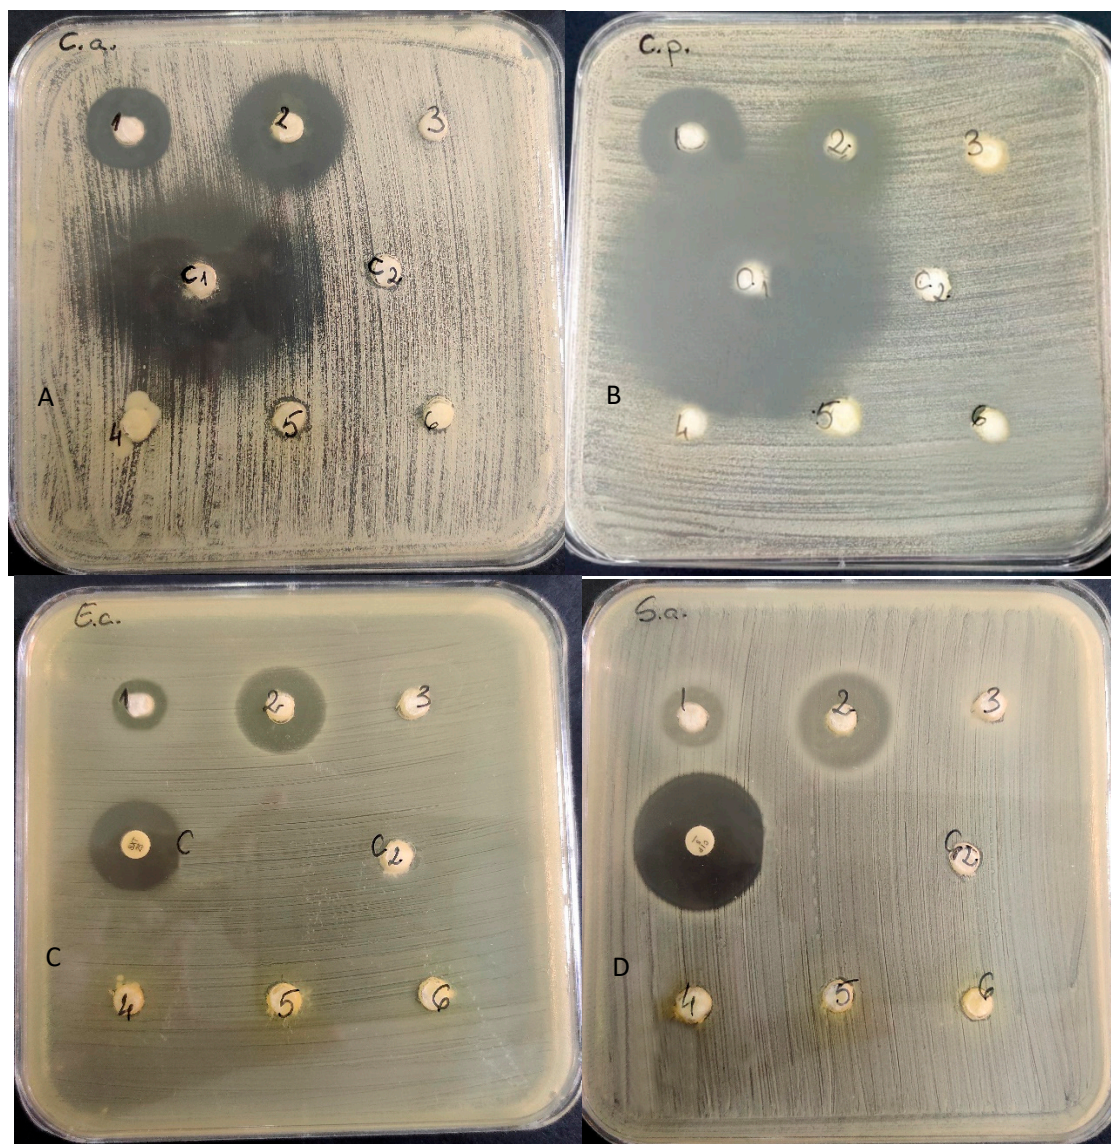

**Figure S1.** Antimicrobial activity of (1) *A. sativum*, (2) *A. ursinum* (3) white variety of *Allium cepa*, (4) Arieș red cultivar of *Allium cepa*, (5) *A. senescens* subsp. *montanum* (F. W. Schmidt) Holub, (6) *A. fistulosum*, C2= Ciprofloxacin/Sulfamethoxazole/Fluconazole (c1C/c1D/c1A,B) C2=ethanol 30%, C2=ethanol 25% against (A) *C. albicans*, (B) *C. parapsilosis* (C) *E. coli*, (D) *S. aureus*.

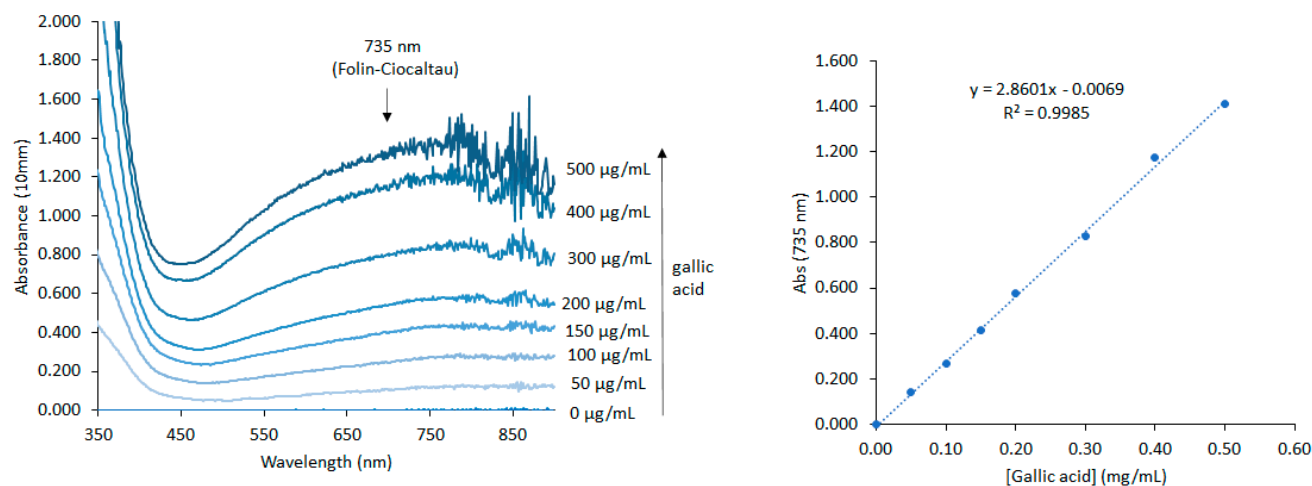

**Figure S2.** UV-vis molecular absorbance spectra of the standard solution and the calibration curve used for TPC determination, according to the described protocol.

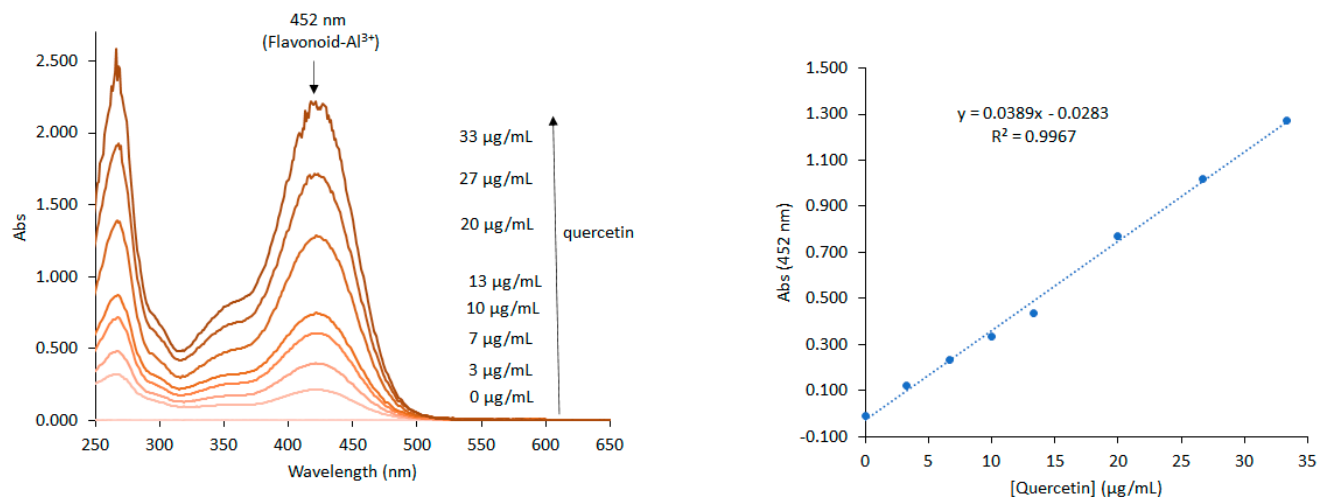

**Figure S3.** UV-vis molecular absorbance spectra of the standard solution and the calibration curve used for TFC determination, according to the described protocol.

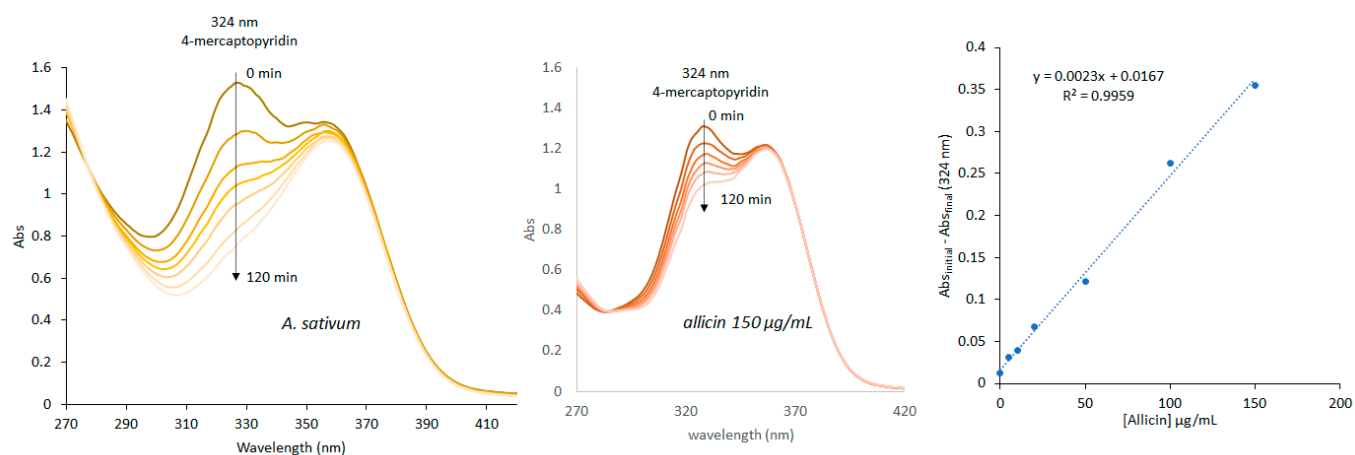

**Figure S4.** Time-dependence UV-vis molecular absorbance spectra for a standard solution and *A. sativum* sample and the calibration curve used for TTC determination, according to the described protocol.

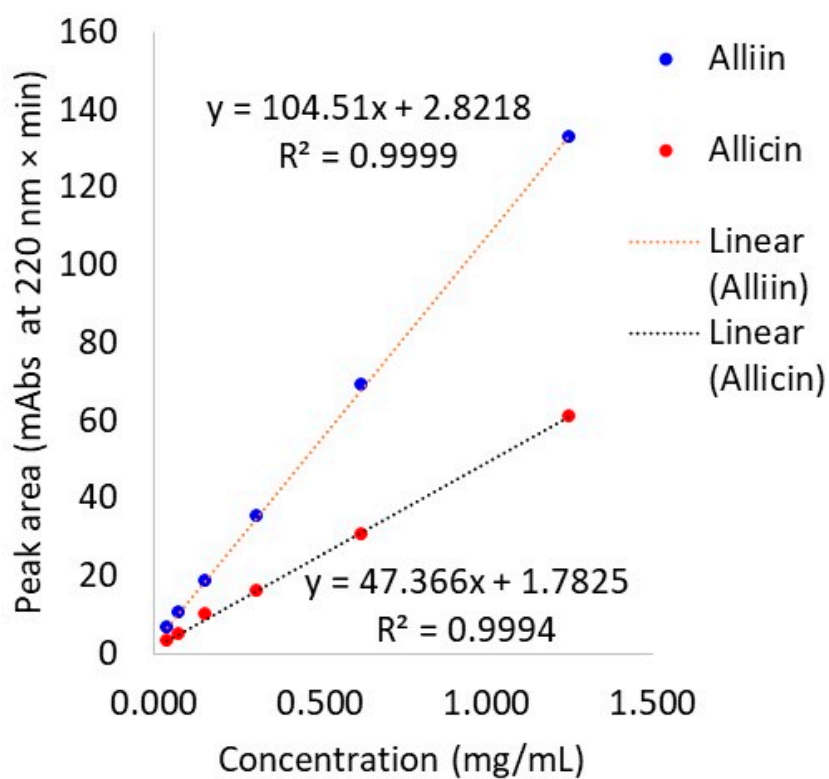

**Figure S5.** Calibration curve for allicin and alliin determination.

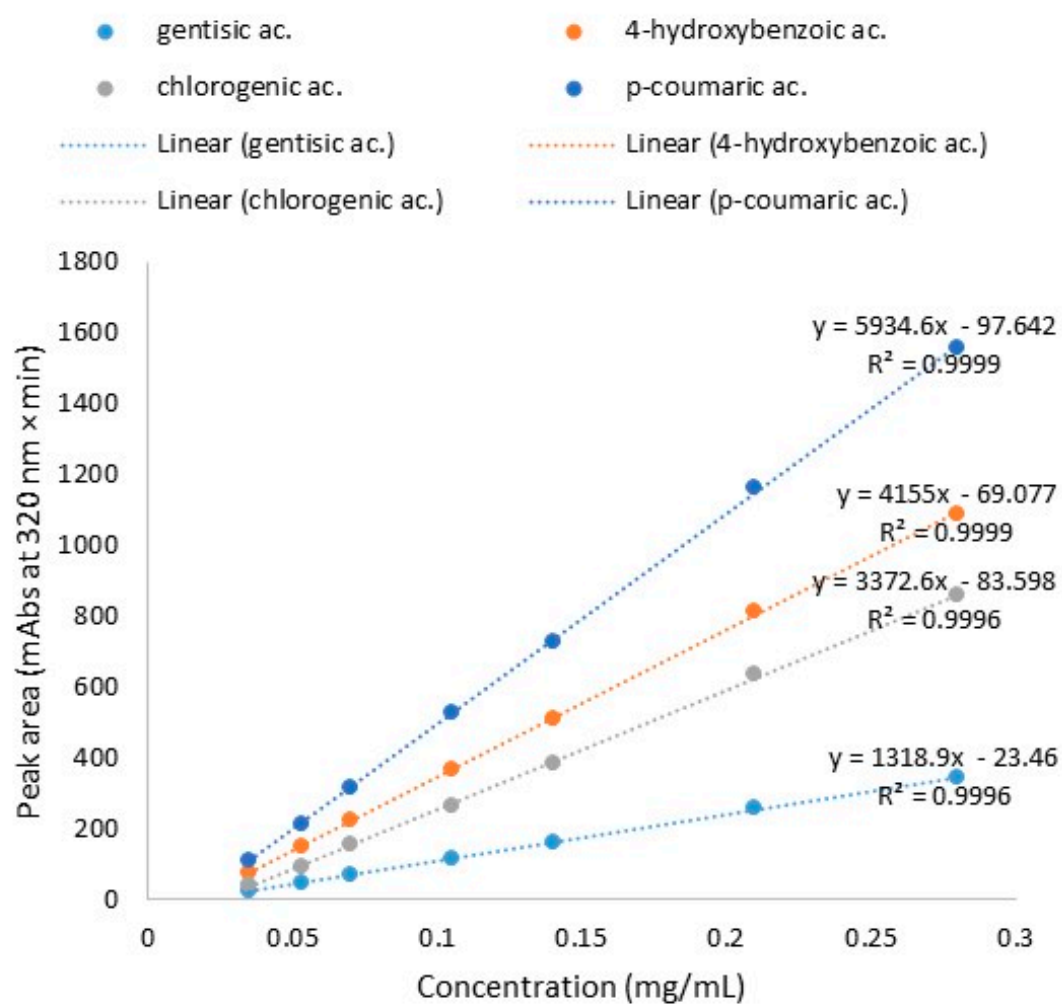

**Figure S6.** Calibration curve for phenolic acids determination.

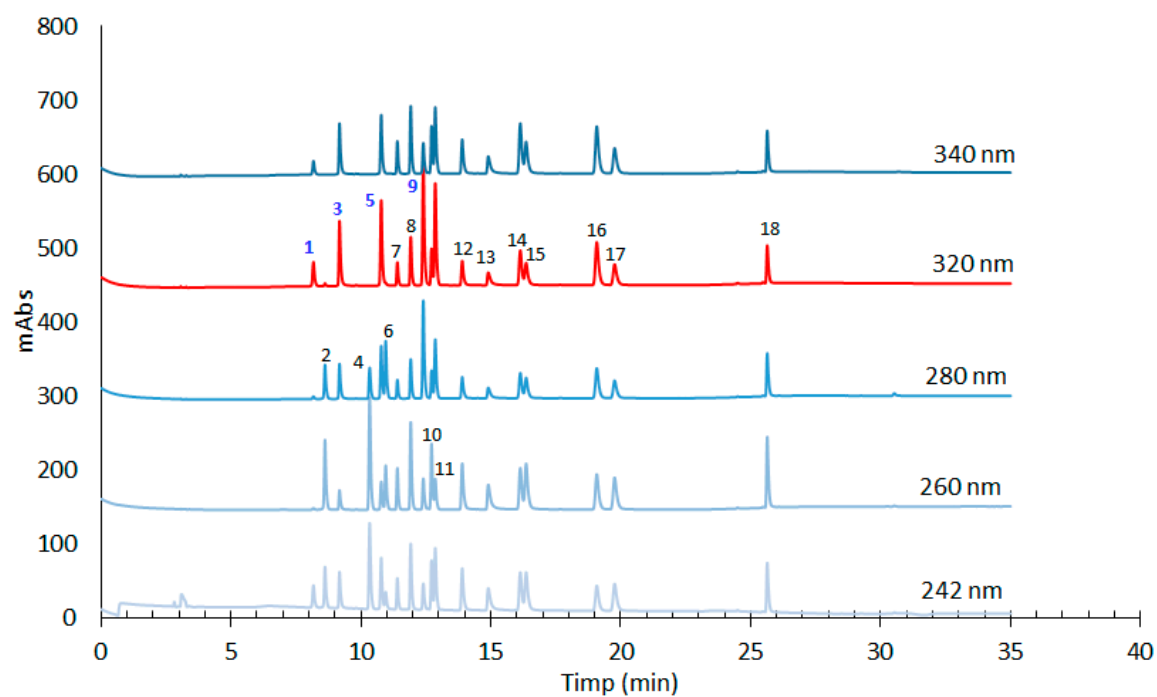

**Figure S7.** Chromatograms monitored at different wavelengths for all the polyphenolic analytes that assessed in samples. Only four phenolic acids were detected in the analysed samples and are indicated with blue colour (here numbers 1, 3, 5 and 9 and their corresponding name is in Table S1).



**Table S1.** Supplementary information and classification for the analytical standards used in this study. The chromatograms of the polyphenolic standards at different wavelength are indicated in Figure S7.

| No. | Standard             | Phytoconstituent class | Chromatographic method <sup>a</sup> | Retention time (min) | Detected in the analysed samples? | Producer, cod standard      | Purity (%)       |
|-----|----------------------|------------------------|-------------------------------------|----------------------|-----------------------------------|-----------------------------|------------------|
| 1   | allicin              | thiosulfinate          | M1                                  | 3.68                 | yes                               | <i>in-house</i> synthesized | ≥94 <sup>b</sup> |
| 2   | alliin               | sulfoxide              | M1                                  | 15.42                | yes                               | Sigma, 74264                | ≥90              |
| 1   | gentisic ac.         | phenolic acid          | M2                                  | 8.13                 | yes                               | Sigma, 149357               | ≥98              |
| 2   | 3,4-dihydroxybenzoic | phenolic acid          | M2                                  | 8.58                 | no                                | Sigma, 37580                | ≥97              |
| 3   | Chlorogenic ac.      | phenolic acid          | M2                                  | 9.15                 | yes                               | Sigma, C3878                | ≥95              |
| 4   | Caffeic ac.          | phenolic acid          | M2                                  | 10.76                | no                                | Sigma, C0625                | ≥98              |
| 5   | 4-hydroxybenzoic     | phenolic acid          | M2                                  | 10.31                | yes                               | Sigma, H20059               | ≥99              |
| 6   | Syringic ac.         | phenolic acid          | M2                                  | 10.94                | no                                | Sigma, S6881                | ≥95              |
| 7   | Rutin                | flavonoid              | M2                                  | 11.39                | no                                | Sigma, R2303                | ≥95              |
| 8   | Isoquercitrin        | flavonoid              | M2                                  | 11.91                | no                                | Sigma, 17793                | ≥90              |
| 9   | p-coumaric           | phenolic acid          | M2                                  | 12.38                | yes                               | Sigma, C9008                | ≥98              |
| 10  | Quercitrin           | flavonoid              | M2                                  | 12.72                | no                                | Sigma, 00740580             | not specified    |
| 11  | Ferulic ac.          | phenolic acid          | M2                                  | 12.85                | no                                | Sigma, 128708               | ≥99              |
| 12  | Myricetin            | flavonoid              | M2                                  | 13.89                | no                                | Sigma, M6760                | ≥96              |
| 13  | Morin                | flavonoid              | M2                                  | 14.88                | no                                | Sigma, M4008                | not specified    |
| 14  | Luteolin             | flavonoid              | M2                                  | 16.12                | no                                | Sigma, 62696                | ≥99              |
| 15  | Quercetin            | flavonoid              | M2                                  | 16.35                | no                                | Sigma, Q0125                | ≥98              |
| 16  | Apigenin             | flavonoid              | M2                                  | 19.08                | no                                | Sigma, 10798                | ≥95              |
| 17  | Kaempferol           | flavonoid              | M2                                  | 19.77                | no                                | Supelco, 96353              | not specified    |
| 18  | Galangin             | flavonoid              | M2                                  | 25.64                | no                                | Supelco, 92342              | not specified    |

<sup>a</sup>The chromatographic methods are described in the main part of the manuscript section 4.3. <sup>b</sup>Purity for allicin is estimated from <sup>1</sup>H-NMR spectral data.
